# Supplementary material for: Cord Blood Banking: Antenatal Care Provider's Roles and Responsibilities
Source: Stem Cells Int. 2019 Mar 7;2019:3598404. doi: 10.1155/2019/3598404 (PMC6431514; doi:10.1155/2019/3598404)
Supplement: Supplementary Materials — . Supporting Information S1 Table: we confirm that the dataset that we have uploaded as S1 Table constitutes the underlying findings of our paper. [file 3598404.f1.xlsx]

## Sheet: Sheet1
S.No.	Age	Sex	Exp	Q1	Q2	Q3	Q4	Q5	Q6	Q7	Q8	Q9	Q10	Q11	Q12	Q13	Q14	Q15	Q16	Q17	Q18	Q19	Q20	Q21	Q22 1	Q22 2	Q22 3	Q22 4
1	51	M	24	D	C	B	B	D	N	Y	DN	N	DN	N	N	Y	Y	Y	DN	Y	Y	DN	Y	3	Y	N	N	Y
2	65	M	35	D	B	B	C	C	Y	Y	Y	DN	DN	N	N	Y	DN	DN	DN	DN	Y	DN	Y	4	Y	N	Y	N
2	27	M	2	D	A	B	B	B	DN	DN	Y	N	DN	N	N	DN	Y	Y	N	Y	DN	N	DN	5	N	N	N	Y
3	55	M	28	D	C	B	D	D	Y	Y	Y	N	N	N	N	Y	Y	Y	DN	Y	N	N	Y	3	Y	Y	Y	Y
4	48	F	22	D	C	D	B	C	DN	Y	Y	DN	DN	N	N	DN	N	DN	N	N	Y	N	DN	3	N	N	Y	Y
5	51	F	24	D	A	B	B	D	N	Y	N	Y	DN	N	Y	DN	Y	N	N	Y	Y	DN	Y	2	Y	N	Y	N
6	40	F	13	D	B	D	D	D	Y	Y	N	N	DN	N	N	DN	Y	DN	DN	DY	DN	DN	DN	4	Y	N	Y	N
7	40	F	14	D	C	D	B	D	Y	Y	Y	N	Y	Y	Y	N	Y	Y	Y	Y	Y	N	Y	2	Y	Y	Y	Y
8	38	F	12	D	C	D	B	D	N	N	N	DN	DN	N	Y	DN	Y	Y	Y	Y	Y	Y	Y	4	N	N	Y	Y
9	38	F	12	D	C	D	C	C	DN	Y	Y	DN	DN	N	N	Y	Y	DN	DN	DN	Y	DN	Y	4	N	N	Y	Y
10	33	F	5	D	C	B	B	D	Y	Y	Y	N	DN	N	N	Y	Y	DN	DN	Y	Y	Y	Y	4	N	N	Y	Y
11	35	F	5	D	D	D	C	D	Y	Y	N	N	DN	N	N	DN	DN	DN	DN	Y	Y	Y	Y	3	N	N	Y	Y
12	32	F	4	D	D	D	C	C	Y	Y	Y	DN	Y	Y	N	DN	DN	Y	Y	DN	DN	DN	DN	4	N	N	Y	Y
13	32	F	4	C	D	D	D	C	Y	Y	N	DN	Y	N	Y	Y	DN	Y	Y	Y	DN	DN	DN	4	N	N	Y	Y
14	33	F	4	D	C	B	C	A	N	DN	DN	N	DN	N	N	DN	Y	Y	Y	DN	DN	DN	DN	4	N	N	Y	Y
15	31	M	3	D	A	B	B	A	DN	Y	DN	N	DN	N	N	DN	Y	Y	Y	Y	DN	DN	DN	4	N	N	Y	Y
16	29	F	2	B	C	B	B	D	DN	Y	Y	N	DN	N	N	DN	Y	Y	Y	Y	Y	DN	DN	4	N	N	Y	Y
17	50	M	20	D	C	B	B	D	DN	DN	Y	DN	DN	N	N	Y	N	Y	N	Y	Y	DN	Y	3	N	N	Y	Y
18	40	F	13	D	C	D	B	D	Y	DN	Y	DN	Y	Y	N	Y	DN	DN	N	Y	Y	Y	Y	3	N	N	Y	Y
19	47	F	20	D	C	D	B	D	Y	DN	N	DN	Y	N	N	Y	DN	DN	DN	DN	Y	N	Y	4	N	N	Y	Y
20	48	F	20	D	C	B	B	A	Y	Y	N	N	Y	N	Y	DN	Y	DN	DN	DN	DN	N	DN	4	N	N	Y	Y
21	40	F	11	D	A	B	D	D	Y	Y	Y	N	Y	N	Y	DN	Y	DN	DN	DN	Y	N	DN	4	N	N	Y	Y
22	34	F	4	D	A	B	C	D	Y	N	Y	N	Y	N	N	DN	Y	DN	Y	DN	Y	N	Y	3	N	N	Y	Y
23	25	F	1	A	A	C	B	B	Y	Y	Y	DN	DN	N	N	Y	DN	DN	DN	DN	Y	DN	Y	5	N	Y	N	Y
24	26	F	1	A	C	A	B	C	Y	DN	DN	N	DN	N	N	DN	DN	Y	DN	DN	Y	N	DN	4	N	Y	N	Y
25	25	F	1	C	A	A	D	B	DN	Y	DN	DN	DN	N	N	DN	Y	Y	Y	Y	Y	DN	DN	5	N	N	N	Y
26	26	F	1	B	B	C	B	C	DN	Y	DN	DN	N	N	N	DN	Y	DN	N	Y	DN	DN	DN	5	N	N	N	Y
27	27	F	1	B	B	A	D	A	N	DN	Y	DN	N	N	N	Y	Y	Y	N	DN	DN	DN	DN	4	N	Y	N	Y
28	28	F	1	C	A	B	D	D	Y	DN	Y	Y	DN	N	N	Y	DN	Y	Y	DN	DN	N	DN	5	Y	N	N	Y
29	26	F	1	D	D	D	D	D	DN	Y	Y	Y	N	N	N	Y	DN	DN	N	DN	Y	N	DN	4	N	N	N	Y
30	26	F	1	A	D	D	B	B	Y	Y	DN	DN	DN	N	N	DN	DN	Y	N	DN	DN	DN	N	5	N	N	N	Y
31	25	F	1	A	A	B	A	B	DN	DN	DN	N	DN	N	N	DN	DN	Y	N	N	Y	DN	N	5	N	N	N	Y
32	28	M	1	A	C	C	A	A	Y	Y	Y	N	DN	N	N	DN	DN	DN	DN	N	Y	DN	Y	4	N	Y	N	Y
33	28	F	1	A	B	A	B	C	Y	Y	Y	DN	DN	N	N	N	DN	DN	DN	Y	Y	Y	DN	5	N	Y	N	Y
34	28	F	1	A	C	A	B	A	Y	Y	Y	DN	DN	N	N	Y	Y	DN	DN	Y	Y	Y	DN	5	N	N	N	Y
35	28	F	2	D	C	D	B	C	Y	Y	DN	DN	DN	N	N	N	Y	Y	DN	Y	Y	N	DN	4	N	N	N	Y
36	27	F	2	D	B	B	C	B	DN	Y	DN	DN	DN	N	N	DN	DN	Y	DN	Y	Y	DN	Y	5	N	N	N	Y
37	27	F	2	C	B	B	B	B	DN	DN	DN	DN	DN	N	N	Y	DN	Y	DN	DN	DN	DN	Y	5	N	N	N	Y
38	29	F	2	B	D	D	B	D	Y	Y	Y	DN	N	N	Y	DN	DN	Y	Y	DN	DN	DN	Y	5	N	N	N	Y
39	30	F	2	B	D	C	A	B	Y	Y	Y	N	N	N	N	DN	DN	DN	Y	DN	DN	N	Y	5	N	N	N	Y
40	27	F	2	C	A	D	A	A	Y	Y	Y	Y	Y	N	N	DN	Y	DN	N	Y	DN	N	Y	5	N	N	Y	Y
41	28	F	2	D	D	B	B	A	DN	Y	Y	N	Y	N	N	Y	Y	DN	N	Y	DN	Y	Y	5	N	Y	N	Y
43	26	F	2	C	B	D	C	B	Y	Y	Y	DN	DN	N	N	Y	Y	DN	DN	Y	Y	N	DN	5	N	N	N	Y
44	27	F	2	C	D	D	D	C	Y	Y	Y	DN	DN	N	N	DN	Y	DN	DN	DN	Y	DN	Y	4	N	N	N	Y
45	26	M	2	C	C	D	D	B	Y	Y	DN	DN	N	N	N	DN	DN	Y	DN	DN	Y	DN	Y	5	N	Y	N	Y
46	28	F	2	D	A	B	D	D	Y	Y	Y	DN	N	N	N	Y	Y	Y	DN	DN	Y	DN	Y	5	N	N	N	Y
47	29	F	3	D	B	D	D	D	Y	Y	Y	DN	DN	DN	N	DN	Y	Y	DN	Y	DN	N	DN	4	Y	N	Y	Y
48	29	F	3	C	C	D	B	C	Y	Y	Y	DN	DN	DN	N	DN	Y	DN	N	DN	DN	N	DN	5	N	N	N	Y
49	29	F	3	C	B	B	B	C	Y	DN	DN	N	Y	Y	N	DN	Y	Y	DN	DN	DN	N	Y	5	N	N	N	Y
50	29	F	3	B	B	B	A	A	DN	Y	DN	N	Y	N	N	DN	DN	Y	N	DN	N	DN	Y	5	N	Y	N	Y
51	30	F	3	B	B	D	D	C	DN	Y	N	Y	N	N	Y	N	Y	Y	N	DN	N	DN	DN	5	N	Y	Y	Y
52	30	F	3	A	A	B	A	B	Y	Y	N	DN	N	N	N	Y	Y	DN	Y	N	Y	N	DN	4	N	Y	N	Y
53	31	F	3	A	A	C	B	B	Y	DN	N	DN	N	N	N	Y	Y	DN	DN	Y	Y	DN	DN	4	N	N	N	Y
54	29	F	3	B	C	C	B	C	Y	DN	Y	DN	DN	DN	N	DN	DN	Y	DN	Y	DN	DN	Y	4	N	N	N	Y
55	64	F	34	A	A	B	B	D	N	Y	DN	DN	DN	N	N	DN	Y	Y	DN	DN	DN	DN	Y	5	N	Y	N	Y
56	49	F	24	D	C	D	B	D	Y	Y	Y	N	Y	Y	Y	N	Y	Y	Y	DN	Y	N	Y	3	Y	Y	Y	Y
57	44	F	18	D	C	D	A	D	DN	Y	DN	N	Y	Y	Y	N	Y	Y	Y	DN	Y	N	Y	3	N	Y	N	Y
58	40	F	12	D	C	B	B	D	N	Y	DN	Y	Y	Y	Y	N	Y	Y	Y	Y	DN	DN	DN	3	N	Y	Y	N
59	34	F	3	D	B	B	B	D	N	Y	DN	Y	Y	N	N	DN	Y	Y	DN	Y	DN	DN	Y	3	N	Y	N	Y
60	34	F	3	D	B	D	B	D	DN	Y	N	N	Y	N	N	DN	Y	Y	DN	DN	DN	DN	Y	3	N	Y	N	Y
61	40	F	12	D	C	D	A	A	DN	Y	Y	N	Y	N	N	DN	Y	Y	DN	DN	N	DN	Y	3	N	N	N	Y
62	32	F	3	D	A	D	B	A	DN	Y	Y	N	DN	N	N	DN	DN	DN	DN	DN	Y	DN	DN	3	N	N	N	Y
63	32	F	3	B	C	B	A	A	DN	Y	DN	N	DN	N	N	DN	DN	DN	DN	DN	Y	DN	DN	3	N	N	N	Y
64	31	M	3	A	A	D	B	D	DN	DN	DN	N	DN	N	N	DN	DN	Y	DN	DN	Y	N	Y	4	N	N	N	Y
65	33	F	6	D	C	D	B	D	Y	DN	DN	N	DN	N	N	DN	DN	Y	DN	DN	Y	N	DN	4	N	N	N	Y
66	30	F	3	D	C	D	B	D	DN	DN	DN	N	DN	N	N	DN	DN	Y	DN	Y	DN	DN	DN	4	N	Y	Y	N
67	30	F	2	B	C	B	A	D	DN	Y	DN	DN	DN	N	N	DN	Y	Y	DN	Y	Y	DN	DN	4	N	Y	Y	Y
68	52	M	27	D	C	B	A	A	N	Y	Y	DN	DN	N	N	DN	Y	Y	Y	DN	DN	DN	DN	4	Y	Y	N	Y
69	48	F	25	D	C	B	C	C	Y	Y	DN	DN	DN	Y	Y	N	DN	Y	Y	DN	DN	DN	DN	4	N	N	N	Y
70	45	M	23	D	A	B	B	A	Y	Y	Y	DN	Y	N	N	DN	DN	Y	DN	DN	DN	DN	Y	3	N	N	N	Y
71	32	M	4	D	A	C	B	A	Y	Y	Y	N	Y	N	N	DN	Y	DN	DN	DN	DN	DN	Y	3	N	Y	N	Y
72	50	M	23	D	A	C	B	D	Y	DN	Y	N	Y	Y	Y	N	Y	DN	Y	DN	Y	N	DN	3	N	Y	N	Y
73	53	M	25	D	C	A	A	D	N	Y	DN	N	Y	N	N	DN	Y	Y	DN	DN	Y	N	DN	5	N	N	N	Y
74	55	F	28	D	C	A	B	A	Y	Y	DN	DN	Y	N	Y	N	Y	Y	Y	Y	Y	N	Y	3	N	N	N	Y
75	57	F	30	D	C	A	A	C	Y	Y	DN	DN	DN	N	N	Y	Y	DN	Y	DN	DN	DN	DN	5	N	N	N	Y
76	51	M	21	D	C	D	B	D	Y	Y	DN	DN	DN	N	N	DN	Y	Y	Y	Y	DN	Y	Y	3	N	N	N	Y
77	49	F	18	D	A	D	A	D	N	Y	DN	DN	Y	N	N	DN	DN	DN	DN	DN	Y	Y	DN	4	N	N	N	Y
78	61	M	30	D	C	D	B	D	DN	Y	Y	DN	Y	N	N	DN	Y	DN	N	DN	DN	DN	DN	3	N	N	N	Y
79	52	F	24	D	C	B	B	A	DN	DN	DN	N	Y	N	N	Y	DN	DN	N	DN	Y	DN	Y	3	Y	N	Y	N
80	40	F	12	C	A	B	A	D	Y	Y	Y	N	Y	DN	N	Y	DN	Y	DN	DN	Y	DN	Y	3	N	N	Y	Y
81	38	F	10	D	A	D	A	C	Y	Y	Y	N	DN	N	N	DN	N	DN	Y	Y	Y	Y	DN	3	N	Y	N	Y
82	42	F	13	C	C	D	D	D	DN	Y	Y	Y	Y	Y	Y	N	N	N	Y	Y	Y	DN	Y	3	N	Y	N	Y
83	42	F	14	D	C	A	D	C	Y	DN	Y	N	Y	N	N	N	DN	DN	DN	DN	DN	N	DN	4	N	Y	N	Y
84	34	F	5	D	A	B	B	D	DN	Y	Y	N	N	N	N	DN	DN	DN	DN	Y	DN	N	DN	3	N	Y	Y	Y
85	35	M	6	D	D	C	A	D	DN	Y	Y	DN	N	N	Y	DN	Y	Y	Y	DN	Y	N	DN	4	N	N	N	Y
86	36	F	7	C	C	D	B	D	Y	Y	N	DN	DN	N	N	N	DN	Y	DN	DN	DN	DN	DN	5	N	N	N	Y
87	34	F	4	C	C	D	B	A	Y	Y	N	DN	DN	N	N	DN	Y	DN	DN	DN	DN	DN	Y	4	N	N	Y	Y
88	37	F	8	D	C	D	B	D	Y	Y	DN	N	DN	N	N	N	Y	DN	Y	N	Y	N	Y	4	N	N	N	Y
89	25	M	1	A	A	C	B	B	Y	Y	Y	DN	DN	N	N	Y	DN	DN	DN	DN	Y	DN	Y	4	N	Y	N	Y
90	26	F	1	A	C	A	B	C	Y	DN	DN	N	DN	N	N	DN	DN	Y	DN	DN	Y	N	DN	4	N	Y	N	Y
91	26	F	1	C	A	A	D	B	DN	Y	DN	DN	DN	N	N	DN	Y	Y	Y	Y	Y	DN	DN	5	N	N	N	Y
92	27	F	1	B	B	C	B	C	DN	Y	DN	DN	N	N	N	DN	Y	DN	N	Y	DN	DN	DN	5	N	N	N	Y
93	26	F	1	B	B	A	D	A	N	DN	Y	DN	N	N	N	Y	Y	Y	N	DN	DN	DN	DN	4	N	Y	N	Y
94	27	F	1	C	A	B	D	D	Y	DN	Y	Y	DN	N	N	Y	DN	Y	Y	DN	DN	N	DN	5	Y	N	N	Y
95	28	F	1	D	D	D	D	D	DN	Y	Y	Y	N	N	N	Y	DN	DN	N	DN	Y	N	DN	4	N	N	N	Y
96	25	F	1	A	D	D	B	B	Y	Y	DN	DN	DN	N	N	DN	DN	Y	N	DN	DN	DN	N	5	N	N	N	Y
97	26	F	1	A	A	B	A	B	DN	DN	DN	N	DN	N	N	DN	DN	Y	N	N	Y	DN	N	5	N	N	N	Y
98	27	F	1	A	C	C	A	A	Y	Y	Y	N	DN	N	N	DN	DN	DN	DN	N	Y	DN	Y	4	N	Y	N	Y
99	27	F	1	A	B	A	B	C	Y	Y	Y	DN	DN	N	N	N	DN	DN	DN	Y	Y	Y	DN	5	N	Y	N	Y
100	28	F	1	A	C	A	B	A	Y	Y	Y	DN	DN	N	N	Y	Y	DN	DN	Y	Y	Y	DN	5	N	N	N	Y
101	28	F	2	D	C	D	B	C	Y	Y	DN	DN	DN	N	N	N	Y	Y	DN	Y	Y	N	DN	4	N	N	N	Y
102	27	M	2	D	B	B	C	B	DN	Y	DN	DN	DN	N	N	DN	DN	Y	DN	Y	Y	DN	Y	5	N	N	N	Y
103	29	M	2	C	B	B	B	B	DN	DN	DN	DN	DN	N	N	Y	DN	Y	DN	DN	DN	DN	Y	5	N	N	N	Y
104	30	F	2	B	D	D	B	D	Y	Y	Y	DN	N	N	Y	DN	DN	Y	Y	DN	DN	DN	Y	5	N	N	N	Y
105	30	F	2	B	D	C	A	B	Y	Y	Y	N	N	N	N	DN	DN	DN	Y	DN	DN	N	Y	5	N	N	N	Y
106	29	F	2	C	A	D	A	A	Y	Y	Y	Y	Y	N	N	DN	Y	DN	N	Y	DN	N	Y	5	N	N	Y	Y
107	28	F	2	D	D	B	B	A	DN	Y	Y	N	Y	N	N	Y	Y	DN	N	Y	DN	Y	Y	5	N	Y	N	Y
108	30	F	2	D	A	B	B	B	DN	DN	Y	N	DN	N	N	DN	Y	Y	N	Y	DN	N	DN	5	N	N	N	Y
109	31	F	2	C	B	D	C	B	Y	Y	Y	DN	DN	N	N	Y	Y	DN	DN	Y	Y	N	DN	5	N	N	N	Y
110	29	F	2	C	D	D	D	C	Y	Y	Y	DN	DN	N	N	DN	Y	DN	DN	DN	Y	DN	Y	4	N	N	N	Y
111	30	F	22	C	C	D	D	B	Y	Y	DN	DN	N	N	N	DN	DN	Y	DN	DN	Y	DN	Y	5	N	Y	N	Y
112	32	F	2	D	A	B	D	D	Y	Y	Y	DN	N	N	N	Y	Y	Y	DN	DN	Y	DN	Y	5	N	N	N	Y
113	28	F	3	D	B	D	D	D	Y	Y	Y	DN	DN	DN	N	DN	Y	Y	DN	Y	DN	N	DN	4	Y	N	N	Y
114	28	F	3	C	C	D	B	C	Y	Y	Y	DN	DN	DN	N	DN	Y	DN	N	DN	DN	N	DN	5	N	N	N	Y
115	29	F	3	C	B	B	B	C	Y	DN	DN	N	Y	Y	N	DN	Y	Y	DN	DN	DN	N	Y	5	N	N	N	Y
116	28	F	3	B	B	B	A	A	DN	Y	DN	N	Y	N	N	DN	DN	Y	N	DN	N	DN	Y	5	N	Y	N	Y
117	29	M	3	B	B	D	D	C	DN	Y	N	Y	N	N	Y	N	Y	Y	N	DN	N	DN	DN	5	N	Y	Y	Y
118	29	F	3	A	A	B	A	B	Y	Y	N	DN	N	N	N	Y	Y	DN	Y	N	Y	N	DN	4	N	Y	N	Y
119	30	F	3	A	A	C	B	B	Y	DN	N	DN	N	N	N	Y	Y	DN	DN	Y	Y	DN	DN	4	N	N	N	Y
120	30	F	3	B	C	C	B	C	Y	DN	Y	DN	DN	DN	N	DN	DN	Y	DN	Y	DN	DN	Y	4	N	N	N	Y
121	42	F	12	D	C	D	B	C	Y	DN	N	N	Y	N	N	Y	Y	Y	Y	Y	Y	N	Y	4	N	N	N	Y
122	44	F	15	D	B	D	B	D	Y	DN	Y	N	N	Y	N	DN	Y	Y	Y	N	Y	N	Y	3	N	N	N	Y
123	46	F	17	D	C	B	D	D	DN	Y	Y	N	N	N	Y	DN	DN	DN	Y	Y	DN	DN	DN	4	N	N	Y	Y
124	43	F	12	C	B	B	D	C	DN	Y	DN	N	N	N	Y	Y	DN	DN	Y	DN	DN	DN	DN	4	N	N	N	Y
125	51	F	22	D	B	C	B	D	Y	DN	DN	DN	DN	N	N	DN	DN	Y	DN	DN	DN	N	DN	5	N	N	Y	Y
126	32	F	4	D	B	D	B	D	Y	DN	DN	DN	Y	DN	N	DN	N	Y	DN	DN	DN	Y	DN	4	N	Y	Y	Y
127	36	F	6	D	A	D	C	D	Y	Y	Y	N	Y	Y	Y	DN	N	Y	DN	Y	Y	Y	DN	4	N	Y	Y	N
128	38	F	8	D	C	C	C	D	Y	Y	Y	DN	Y	Y	Y	DN	N	Y	DN	Y	Y	Y	Y	4	N	Y	Y	N
129	43	F	13	C	C	D	C	C	Y	Y	DN	N	N	N	N	Y	Y	YD	DN	Y	Y	DN	DN	5	N	N	Y	Y
130	32	M	2	D	C	D	B	C	Y	Y	Y	N	Y	N	N	DN	N	DN	Y	DN	DN	DN	Y	4	N	N	N	Y
131	44	F	14	D	C	D	B	C	Y	Y	Y	N	N	N	Y	Y	DN	DN	Y	DN	Y	DN	DN	3	N	N	N	Y
132	53	F	24	D	C	C	B	B	N	DN	N	N	DN	N	N	DN	Y	DN	DN	DN	Y	DN	Y	4	N	N	Y	Y
133	58	M	28	C	A	C	B	D	N	DN	N	DN	DN	N	N	Y	Y	DN	Y	DN	Y	DN	DN	3	N	N	Y	Y
134	62	M	33	D	B	D	B	A	Y	DN	N	DN	DN	N	N	N	Y	DN	DN	DN	DN	N	DN	3	N	Y	Y	N
135	42	F	12	D	D	C	B	D	Y	DN	Y	N	Y	N	N	DN	DN	Y	Y	Y	DN	N	Y	3	N	Y	Y	N
136	45	F	15	D	C	D	B	D	Y	Y	DN	N	Y	N	N	DN	DN	Y	Y	Y	DN	DN	Y	4	Y	N	Y	N
137	35	F	5	D	C	C	C	D	Y	Y	Y	N	N	N	N	N	DN	Y	Y	Y	DN	N	Y	4	N	Y	N	N
138	47	F	17	C	C	C	B	A	N	Y	DN	N	DN	N	N	Y	Y	Y	DN	N	DN	DN	DN	4	N	Y	N	N
139	48	F	18	D	D	C	B	A	N	DN	DN	DN	DN	Y	N	Y	Y	Y	DN	N	Y	N	DN	5	N	N	Y	N
140	51	F	22	D	D	D	B	C	N	DN	N	DN	DN	N	N	DN	Y	DN	DN	Y	Y	N	Y	5	N	N	Y	N
141	43	M	14	D	C	D	D	C	DN	Y	Y	DN	N	N	N	DN	N	N	Y	N	Y	DN	Y	3	N	Y	Y	N
142	41	F	11	D	C	D	A	A	Y	Y	Y	DN	N	N	N	Y	N	N	DN	N	Y	DN	DN	4	N	N	N	Y
143	32	F	2	D	C	D	A	D	Y	Y	Y	N	N	N	N	Y	DN	N	DN	DN	Y	DN	DN	3	Y	N	Y	Y
144	31	F	2	D	D	D	A	D	DN	Y	Y	N	N	Y	N	Y	Y	Y	DN	DN	Y	N	Y	3	N	Y	N	Y
145	35	F	4	D	D	D	D	A	DN	Y	Y	N	N	Y	N	Y	DN	Y	DN	DN	Y	N	Y	4	N	N	N	Y
146	36	F	7	D	B	B	D	A	Y	Y	Y	N	N	N	Y	Y	Y	Y	DN	DN	Y	DN	DN	4	N	N	N	Y
147	33	M	4	D	B	A	D	D	DN	Y	Y	N	Y	N	Y	Y	Y	Y	DN	Y	Y	DN	DN	4	N	N	Y	Y
148	38	F	9	D	C	C	C	D	Y	Y	Y	N	Y	N	N	Y	DN	Y	Y	Y	Y	DN	DN	3	N	N	Y	Y
149	40	F	11	C	C	C	B	D	Y	Y	Y	N	DN	N	N	Y	Y	Y	Y	Y	DN	DN	DN	5	N	Y	Y	Y
150	42	F	13	B	A	D	B	D	N	Y	N	N	DN	N	N	Y	Y	Y	Y	Y	Y	DN	Y	5	N	N	Y	Y
151	46	F	17	D	C	D	B	C	N	Y	N	N	DN	N	N	Y	Y	DN	DN	Y	DN	DN	Y	5	N	N	Y	Y
152	44	F	16	D	A	D	C	C	Y	Y	N	DN	Y	N	N	DN	Y	Y	DN	Y	Y	N	Y	4	N	N	N	Y
153	48	F	18	D	C	B	B	C	Y	Y	N	DN	Y	N	N	DN	Y	Y	N	Y	Y	N	Y	4	N	Y	N	Y
154	44	M	15	D	B	B	B	D	Y	Y	Y	DN	Y	N	N	DN	Y	Y	Y	DN	Y	Y	Y	4	Y	N	N	Y
